# Supplementary material
Source: PubMed Central journal article supplement (PMC8864484)
Supplement: MD-013-D1MD00316J-s001.pdf [file MD-013-D1MD00316J-s001.pdf]

## Supporting information

### Covalent Sortase A Inhibitor ML346 Prevents *Staphylococcus aureus* Infection of *Galleria mellonella*

Xiang-Na Guan,<sup>‡,a,b</sup> Tao Zhang,<sup>‡,a</sup> Teng Yang,<sup>a,c</sup> Ze Dong,<sup>a</sup> Song Yang,<sup>c</sup> Lefu Lan,<sup>a,b,e</sup>  
Jianhua Gan,<sup>d</sup> Cai-Guang Yang<sup>\*,a,b,e</sup>

<sup>a</sup> Center for Chemical Biology, State Key Laboratory of Drug Research, Shanghai Institute of Materia Medica, Chinese Academy of Sciences, Shanghai 201203, China

<sup>b</sup> University of the Chinese Academy of Sciences, Beijing 100049, China

<sup>c</sup> State Key Laboratory Breeding Base of Green Pesticide and Agricultural Bioengineering, Key Laboratory of Green Pesticide and Agricultural Bioengineering, Ministry of Education, Center for R&D of Fine Chemicals, Guizhou University, Guiyang 550025, China

<sup>d</sup> School of Life Sciences, Fudan University, Shanghai 200433, China

<sup>e</sup> School of Pharmaceutical Science and Technology, Hangzhou Institute for Advanced Study, University of Chinese Academy of Sciences, Hangzhou 310024, China

<sup>‡</sup> These authors contributed equally.

\* Correspondence: yangcg@simm.ac.cn (C.-G.Y.)

#### Contents:

|                                                                                                            |    |
|------------------------------------------------------------------------------------------------------------|----|
| <b>Figure S1.</b> Identification of SrtA inhibitors. ....                                                  | S2 |
| <b>Figure S2.</b> Characterization on mode of action of ML346. ....                                        | S3 |
| <b>Figure S3.</b> Effect of ML346 on biofilm formation of <i>S. aureus</i> Newman and USA300 strains. .... | S3 |
| <b>Figure S4.</b> Toxicity study of ML346 on bacteria and <i>G. mellonella</i> . ....                      | S4 |
| <b>Table S1.</b> Inhibition of proteases by ML346. ....                                                    | S4 |
| <b>Table S2.</b> Data collection and refinement statistics <sup>a</sup> . ....                             | S5 |
| <b>Table S3.</b> MIC values of ML346. ....                                                                 | S5 |

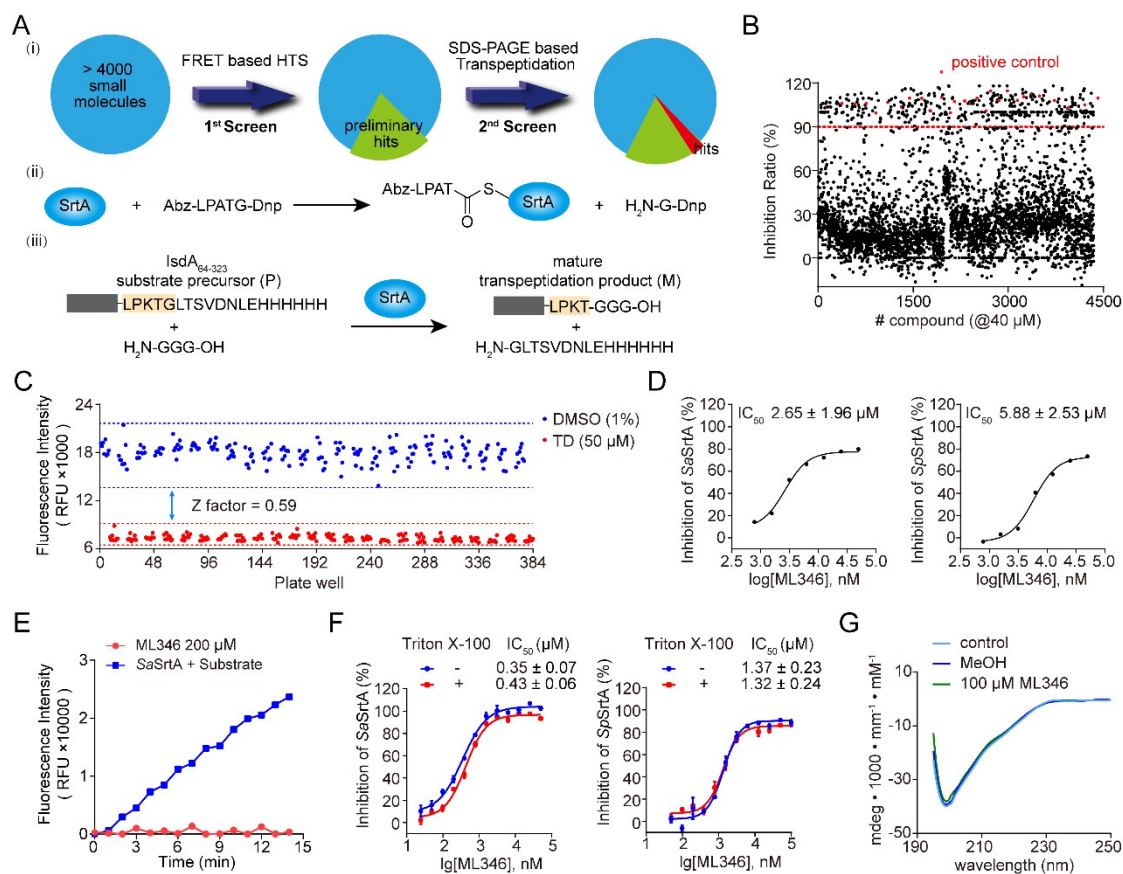

**Figure S1. Identification of SrtA inhibitors.** (A) Overview of SrtA inhibitors screening. (i) Schematic diagram of SrtA inhibitor screening procedure. (ii) The reaction scheme of FRET-based screening. (iii) The reaction scheme of PAGE-based screening. (B) High throughput screening was performed in FRET based assay and compounds with inhibition ratio > 90% at 40 μM were considered as preliminary hits. (C) Z factor plot of HTS of SrtA inhibitors using the FRET assay in the black 384-well plates. (D) IC<sub>50</sub> curves of ML346 against *Sa*SrtA<sub>ΔN24</sub> (left) and *Sp*SrtA<sub>ΔN81</sub> (right) quantified by band intensity in Figure 1C. (E) Detection of fluorescence of compound ML346. (F) Effect of 0.1% detergent Triton X-100 on IC<sub>50</sub> of ML346 against *Sa*SrtA<sub>ΔN24</sub> (left) and *Sp*SrtA<sub>ΔN81</sub> (right) in FRET based assay. (G) CD spectra of *Sa*SrtA<sub>ΔN24</sub> with or without ML346 in methanol (MeOH).

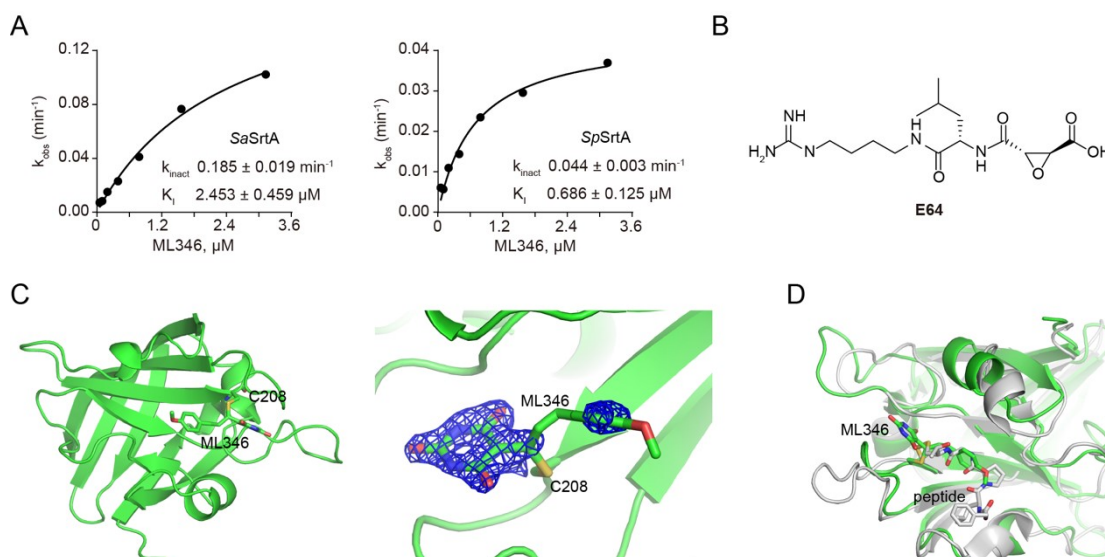

**Figure S2. Characterization on mode of action of ML346.** (A) Determination of inhibition constant ( $k_{inact}$  and  $K_i$ ). (B) Chemical structure of E64. (C) X-ray crystal structure of *SpSrtA* $_{\Delta N81}$ /ML346 complex. Fo-Fc omit map is colored in blue. (D) Structural alignment of *SaSrtA* $_{\Delta N59}$ /peptide (gray, PDB ID: 2KID) and *SpSrtA* $_{\Delta N81}$ /ML346 (green, PDB ID: 7V6K). The structural superimposition was performed in PyMol.

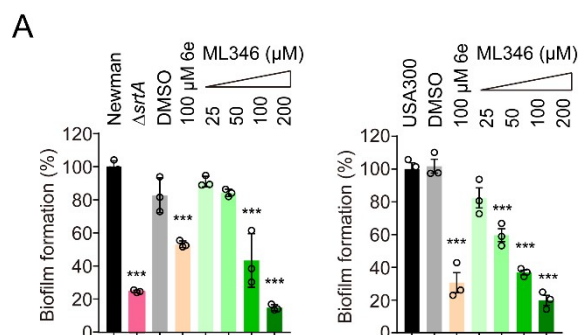

**Figure S3. Effect of ML346 on biofilm formation of *S. aureus* Newman and USA300 strains.** A. The reversible inhibitor 6e was assayed as a positive control. Statistical significance ( $*P < 0.05$ ,  $**P < 0.01$ ,  $***P < 0.001$ ) was determined using the unpaired, two-tailed Student's t test ( $n = 3$ ). Data were presented as mean  $\pm$  SEM.

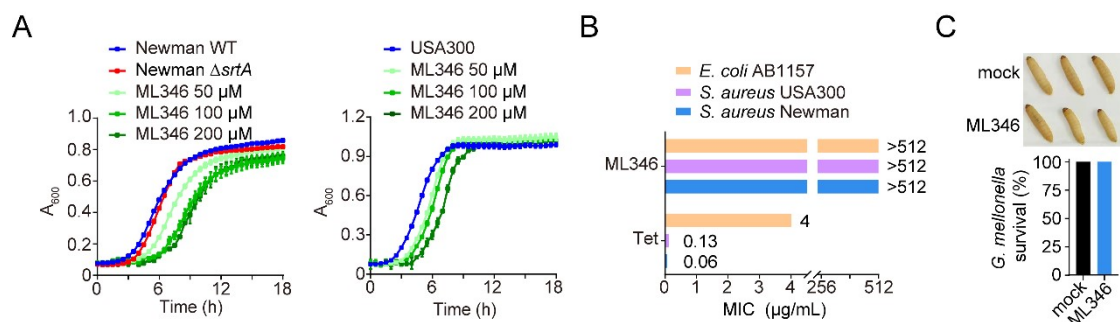

**Figure S4. Toxicity study of ML346 on bacteria and *G. mellonella*.** (A) Effect of ML346 on bacterial growth of *S. aureus* Newman (left) and USA300 (right) strains. (B) Determination of MIC values of ML346 for inhibition on the growth of *S. aureus* Newman, *S. aureus* USA300, and *E. coli* AB1157 strains. Tet, tetracycline was assayed as a control. (C) The appearance (top) and survival rate (bottom) of *G. mellonella* (n = 15) after a 120 h treatment with 60 mg/kg ML346.

**Table S1. Inhibition of proteases by ML346.**

| Compound           | Remaining activity (%) |                |
|--------------------|------------------------|----------------|
|                    | cathepsin B            | cathepsin L    |
| E64 (6.25 nM)      | 33% $\pm$ 0.8%         | 18% $\pm$ 1.7% |
| ML346 (20 $\mu$ M) | 86% $\pm$ 0.7%         | 91% $\pm$ 2.3% |

**Table S2. Data collection and refinement statistics<sup>a</sup>.**

| <i>SpSrtA/ML346 (7V6K)</i>         |                                     |
|------------------------------------|-------------------------------------|
| <b>Data collection</b>             |                                     |
| Space group                        | P 31 2 1                            |
| Cell dimensions                    |                                     |
| <i>a</i> , <i>b</i> , <i>c</i> (Å) | 34.33, 34.33, 396.23                |
| $\alpha$ , $\beta$ , $\gamma$ (°)  | 90, 90, 120                         |
| Resolution (Å)                     | 29.73-1.57 (1.61-1.57) <sup>b</sup> |
| No. of observations                | 658629                              |
| No. unique                         | 40185 (2808)                        |
| $R_{\text{merge}}^{\text{c}}$      | 0.067 (0.843)                       |
| $I/\sigma(I)$                      | 20.7 (2.3)                          |
| Completeness (%)                   | 99.8 (99.1)                         |
| Redundancy                         | 16.4 (9.2)                          |
| <b>Data refinement</b>             |                                     |
| Resolution (Å)                     | 29.0-1.57                           |
| No. reflections                    | 40001                               |
| Completeness (%)                   | 99.76                               |
| $R_{\text{work}}/R_{\text{free}}$  | 0.19/0.22                           |
| No. atoms                          |                                     |
| protein                            | 2579                                |
| water                              | 120                                 |
| Mean B value (Å <sup>2</sup> )     | 23.86                               |
| Rmsd <sup>d</sup> in               |                                     |
| Bond lengths (Å)                   | 0.008                               |
| Bond angles (°)                    | 1.047                               |
| Ramachandran Plot                  |                                     |
| Favored (%)                        | 98.71                               |
| Allowed (%)                        | 1.29                                |

<sup>a</sup> The structure was solved using one crystal.

<sup>b</sup> Highest resolution shell is shown in parenthesis.

<sup>c</sup>  $R_{\text{merge}} = \sum(|I - \langle I \rangle|) / \sum(I)$ , where *I* is the observed intensity.

<sup>d</sup> Root mean squared deviation.

**Table S3. MIC values of ML346.**

| Isolate     |              | <i>S. aureus</i> | <i>S. aureus</i> | <i>E. coli</i> |
|-------------|--------------|------------------|------------------|----------------|
| Strain      |              | Newman           | USA300           | AB1157         |
| MIC (µg/mL) | Vancomycin   | 2                | 2                | >64            |
|             | Kanamycin    | 5                | >160             | 20             |
|             | Tetracycline | 0.0625           | 0.125            | 4              |
|             | ML346        | >512             | >512             | >512           |
